# Supplementary material for: Characterization of extramedullary disease in B-ALL and response to CAR T-cell therapy
Source: PubMed Central journal article supplement — Blood Adv. 2022 Mar 31;6(7):2167–82. doi: 10.1182/bloodadvances.2021006035 (PMC9006258; doi:10.1182/bloodadvances.2021006035), 2022-03-31
Supplement: advancesADV2021006035-suppl1.pdf [file advancesADV2021006035-suppl1.pdf]

Supplemental Table 1. Criteria and corresponding grade of non-CNS EMD response to CAR T-cells.

| <b>Complete response (CR)</b>                                                                                                                                                       | <b>Partial response (PR)</b>                                                                                  | <b>Stable disease (SD)</b>                                                                                                                   | <b>Progressive disease (PD)</b>                                                      |
|-------------------------------------------------------------------------------------------------------------------------------------------------------------------------------------|---------------------------------------------------------------------------------------------------------------|----------------------------------------------------------------------------------------------------------------------------------------------|--------------------------------------------------------------------------------------|
| No evidence of non-CNS EMD identifiable on FDG PET-CT imaging.                                                                                                                      | Evidence of interval disease reduction with residual FDG-avid non-CNS EMD identifiable on FDG PET-CT imaging. | Evidence of persistent or unchanged FDG-avid non-CNS EMD seen at initial presentation to our institution identifiable on FDG PET-CT imaging. | Evidence of new or worsened sites of non-CNS EMD identifiable on FDG PET-CT imaging. |
| CAR, chimeric antigen receptor; FDG PET-CT, 18-fluorodeoxyglucose positron emission tomography-computed tomography; non-CNS EMD, non-central nervous system extramedullary disease. |                                                                                                               |                                                                                                                                              |                                                                                      |

Supplemental Table 2. Response to one dose of pembrolizumab following CAR T-cell infusion in select patients with B-ALL non-CNS EMD (n=3).

| Patient                | Demographics;<br>Non-CNS EMD at<br>Presentation                        | Peripheral Blood<br>CAR Expansion                    | Response to CAR                                                           | Pembrolizumab<br>rationale                                                          | Pembrolizumab<br>administration | Immune-<br>related<br>Adverse<br>Events | Response to<br>pembrolizumab                     |
|------------------------|------------------------------------------------------------------------|------------------------------------------------------|---------------------------------------------------------------------------|-------------------------------------------------------------------------------------|---------------------------------|-----------------------------------------|--------------------------------------------------|
| 14                     | 18yo M; retroperitoneal and pelvic wall lymph nodes, pancreas, testes  | Max: 12.7% (d+13)<br><br>0.2% prior to pembrolizumab | PD: medullary MRD CR, worsened non-CNS EMD (lymph node, pancreas, testes) | Augment circulating CAR against CD19+/CD22+ new non-CNS EMD                         | Day +84                         | None                                    | Non-CNS EMD PD 3 weeks after administration      |
| 40# (2 <sup>nd</sup> ) | 30yo F; mandible, maxilla, breast, kidney, lymph nodes, bones          | Max: 21% (d+6)<br><br>0% prior to pembrolizumab      | MRD-negative CR, early loss of CAR                                        | Induce re-expansion of CAR as bridge to HSCT                                        | Day +22                         | None                                    | Peripheral blood PD 11 days after administration |
| 41# (2 <sup>nd</sup> ) | 8yo M; mandible, kidney, scapula, sternum, costochondral region, femur | Max: 1.8% (d+13)<br><br>0% prior to pembrolizumab    | PD: medullary PD, stable non-CNS EMD                                      | Augment CAR expansion given suboptimal expansion and response to first CAR infusion | Day -16                         | Persistent fevers of unclear etiology   | PD: stable non-CNS EMD with medullary PD         |

CAR, chimeric antigen receptor; CR, complete response/complete remission; HSCT, hematopoietic stem cell transplantation; non-CNS EMD, non-central nervous system extramedullary disease; PD, progressive disease. Patients 40# and 41# were recently treated after study cutoff of 5/1/2020. "2<sup>nd</sup>" indicates treatment with a re-infusion of the same CAR T-cell product.
